# Supplementary material for: SlyA Protein Activates fimB Gene Expression and Type 1 Fimbriation in Escherichia coli K-12
Source: PubMed Central journal article supplement — J Biol Chem. 2011 Jul 15;286(37):32026–35. doi: 10.1074/jbc.M111.266619 (PMC3173223; doi:10.1074/jbc.m111.266619), 2011-07-15
Supplement: supp_M111.266619_jbc.M111.266619-1.pdf [file supp_M111.266619_jbc.M111.266619-1.pdf]

## Bacterial strains used in this study

| Strain   | Relevant Characteristics                                                                       | Details                            |
|----------|------------------------------------------------------------------------------------------------|------------------------------------|
| MG1655   | $\lambda$ F <sup>-</sup> Fim <sup>+</sup>                                                      | ECGSC<br>(31)                      |
| AAEC072A | MG1655 $\Delta$ <i>fimB-H</i>                                                                  | (33)                               |
| AAEC370A | MG1655 $\Delta$ <i>lacZYA fimE-am18 fimA-lacZYA</i>                                            | (60)                               |
| AAEC554  | MG1655 ( <i>fimS</i> locked ON)                                                                | (61)                               |
| BGEC905  | MG1655 $\Delta$ <i>lacZYA</i> FimB-LacZ                                                        | (45)                               |
| JW5267   | BW25113 $\Delta$ <i>slyA</i> $\Omega$ Kan <sup>R</sup>                                         | Keio collection (39)               |
| KCEC357  | BGEC905 $\Delta$ <i>nanR</i>                                                                   | (45)                               |
| KCEC505  | BGEC905 <i>nagC</i> $\Omega$ Tet <sup>R</sup>                                                  | (45)                               |
| KCEC755  | BGEC905 <i>hns::mTn10</i>                                                                      | our unpublished work               |
| KCEC840  | BGEC905 $\Delta$ <i>ApaLI-BamHI</i> $\Omega$ ( <i>sacB</i> -Kan <sup>R</sup> )                 | our unpublished work               |
| KCEC1077 | BGEC905 <i>rm21</i>                                                                            | Allelic exchange (KCEC840)         |
| KCEC1079 | BGEC905 <i>rm22</i>                                                                            | Allelic exchange (KCEC840)         |
| KCEC1235 | MG1655 $\Delta$ <i>slyA</i> $\Omega$ Kan <sup>R</sup>                                          | P1 transduction (MG1655)           |
| KCEC1243 | BGEC905 $\Delta$ <i>slyA</i> $\Omega$ Kan <sup>R</sup>                                         | P1 transduction (BGEC905)          |
| KCEC1271 | BGEC905 <i>rm21</i> $\Delta$ <i>slyA</i> $\Omega$ Kan <sup>R</sup>                             | P1 transduction (KCEC1077)         |
| KCEC1273 | BGEC905 <i>rm22</i> $\Delta$ <i>slyA</i> $\Omega$ Kan <sup>R</sup>                             | P1 transduction (KCEC1079)         |
| KCEC1275 | BGEC905 $\Delta$ <i>nanR</i> $\Delta$ <i>slyA</i> $\Omega$ Kan <sup>R</sup>                    | P1 transduction (KCEC357)          |
| KCEC1278 | BGEC905 <i>nagC</i> $\Omega$ Tet <sup>R</sup> $\Delta$ <i>slyA</i> $\Omega$ Kan <sup>R</sup>   | P1 transduction (KCEC1243)         |
| KCEC1300 | BGEC905 $\Delta$ <i>slyA</i> $\Omega$ Kan <sup>R</sup> <i>hns::mTn10</i>                       | P1 transduction (KCEC1243)         |
| KCEC1334 | BGEC905 $\Delta$ <i>slyA</i>                                                                   | Kan <sup>R</sup> curing (KCEC1243) |
| KCEC1360 | AAEC370A $\Delta$ <i>slyA</i> $\Omega$ Kan <sup>R</sup>                                        | P1 transduction (AAEC370A)         |
| KCEC1398 | BGEC905 $\Delta$ <i>slyA</i> $\Delta$ <i>lacZYA</i> $\Omega$ ( <i>sacB</i> -Kan <sup>R</sup> ) | P1 transduction (KCEC1334)         |
| KCEC1494 | BGEC905 $\Delta$ <i>slyA</i> <i>lacUV5-slyA</i> <sub>UUG</sub>                                 | Allelic exchange (KCEC1398)        |
| KCEC1765 | BGEC905 $\Delta$ <i>slyA</i> <i>lacUV5-slyA</i> <sub>AUG</sub>                                 | Allelic exchange (KCEC1398)        |
| KCEC1831 | BGEC905 <i>rm35</i>                                                                            | Allelic exchange (KCEC840)         |
| KCEC1854 | BGEC905 <i>rm35</i> $\Delta$ <i>slyA</i> $\Omega$ Kan <sup>R</sup>                             | P1 transduction (KCEC1854)         |
| KCEC2014 | BGEC905 <i>rm39</i>                                                                            | Allelic exchange (KCEC840)         |
| KCEC2016 | BGEC905 <i>rm40</i>                                                                            | Allelic exchange (KCEC840)         |
| KCEC2020 | BGEC905 <i>rm39</i> $\Delta$ <i>slyA</i> $\Omega$ Kan <sup>R</sup>                             | P1 transduction (KCEC2014)         |
| KCEC2022 | BGEC905 <i>rm40</i> $\Delta$ <i>slyA</i> $\Omega$ Kan <sup>R</sup>                             | P1 transduction (KCEC2016)         |
